# Supplementary material for: Weight change-related factors during the COVID-19 pandemic: a population-based cross-sectional study using social cognitive theory
Source: PeerJ journal article supplement (doi:10.7717/peerj.13829), 2022-07-27

**Appendix 1:** A diagram representing the survey variables mapped to the three pillars of the Social Cognitive Theory

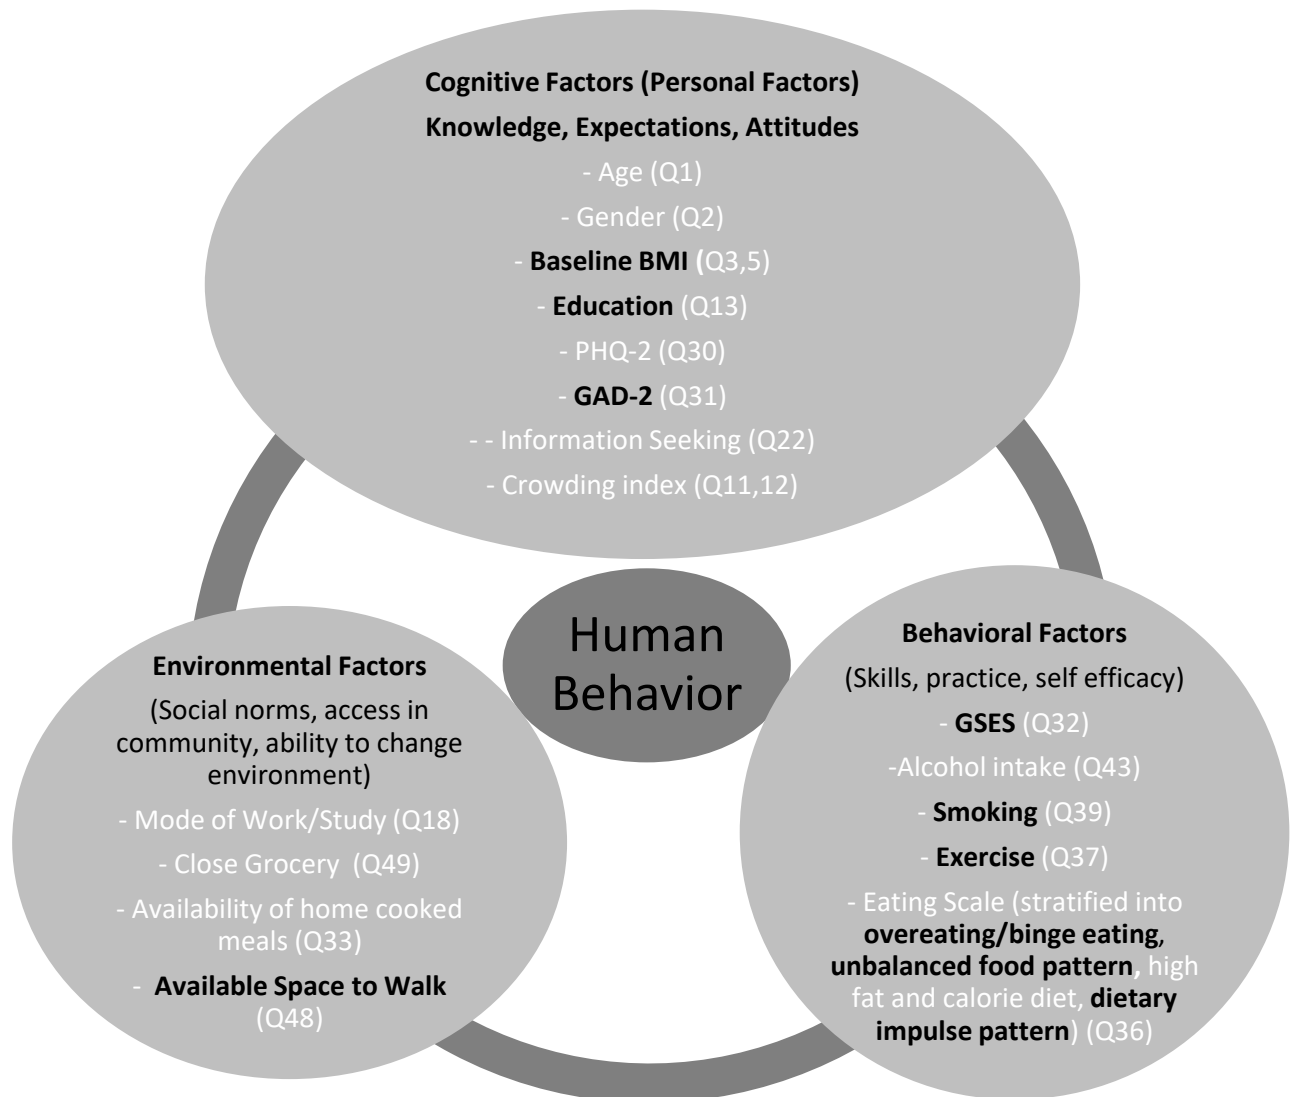

Supplement: Appendix_1.pdf [file Appendix_1.pdf]
